# Supplementary material for: Constructing CrIII-centered heterometallic complexes: [NiII6CrIII] and [CoII6CrIII] wheels
Source: Royal Society of Chemistry journal article supplement (doi:10.1039/c7dt04043a), 2017-11-17
Supplement: c7dt04043a1.pdf [file c7dt04043a1.pdf]

## ELECTRONIC SUPPLEMENTARY INFORMATION

### Constructing Cr<sup>III</sup>-centered heterometallic complexes: [Ni<sup>II</sup><sub>6</sub>Cr<sup>III</sup>] and [Co<sup>II</sup><sub>6</sub>Cr<sup>III</sup>] wheels †

Foteini E. Kakaroni,<sup>a</sup> Alexandra Collet,<sup>b</sup> Eirini Sakellari,<sup>a</sup> Demetrios I. Tzimopoulos,<sup>c</sup> Milosz Siczek,<sup>d</sup> Tadeus Lis,<sup>d</sup> Mark Murrie<sup>b,\*</sup> and Constantinos J. Milios<sup>a,\*</sup>

<sup>a</sup> Department Of Chemistry, University of Crete, Voutes 71003, Herakleion, Greece. Fax: +30-2810-545001; Tel: +30-2810-545099; E-mail: [kamil@uoc.gr](mailto:kamil@uoc.gr)

<sup>b</sup> WestCHEM, School of Chemistry, University of Glasgow, University Avenue, Glasgow, G12 8QQ, UK. E-mail: [Mark.Murrie@glasgow.ac.uk](mailto:Mark.Murrie@glasgow.ac.uk)

<sup>c</sup> Department of Chemistry, Aristotle University of Thessaloniki, 54124 Thessaloniki, Greece

<sup>d</sup> Faculty of Chemistry, University of Wrocław, Joliot-Curie 14, Wrocław 50-383, Poland.

## Materials and physical measurements

All manipulations were performed under aerobic conditions, using materials as received. Elemental analyses (C, H, N) were performed by the University of Ioannina microanalysis service. Variable-temperature, solid-state direct current (dc) magnetic susceptibility data down to 2.0 K were collected on a Quantum Design MPMS-XL SQUID magnetometer equipped with a 5 T DC magnet at the University of Glasgow. Diamagnetic corrections were applied to the observed paramagnetic susceptibilities using Pascal's constants.

## Elemental analysis for 1 and 2

Elemental Anal. calcd (found) for **1**·3MeOH·H<sub>2</sub>O: C 54.07 (54.16), H 4.51 (4.32), N 14.28 (14.22) %. **2**·2MeOH: C 54.51 (54.59), H 4.40 (4.23), N 14.48 (14.40) %.

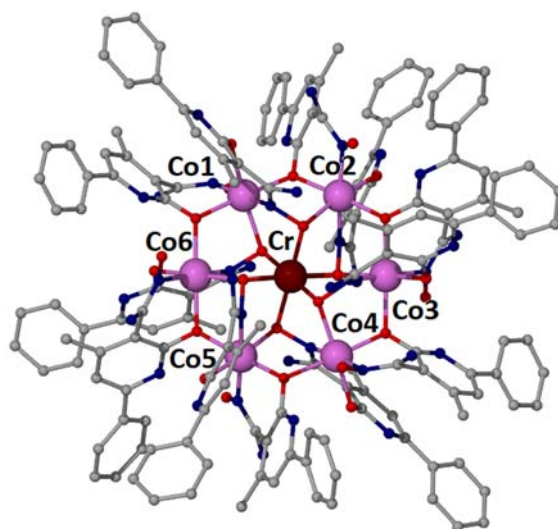

**Figure S1.** The molecular structure of **2**. Colour code: Cr(III) = brown; Co(II) = pink; O = red; N = blue; C = grey.

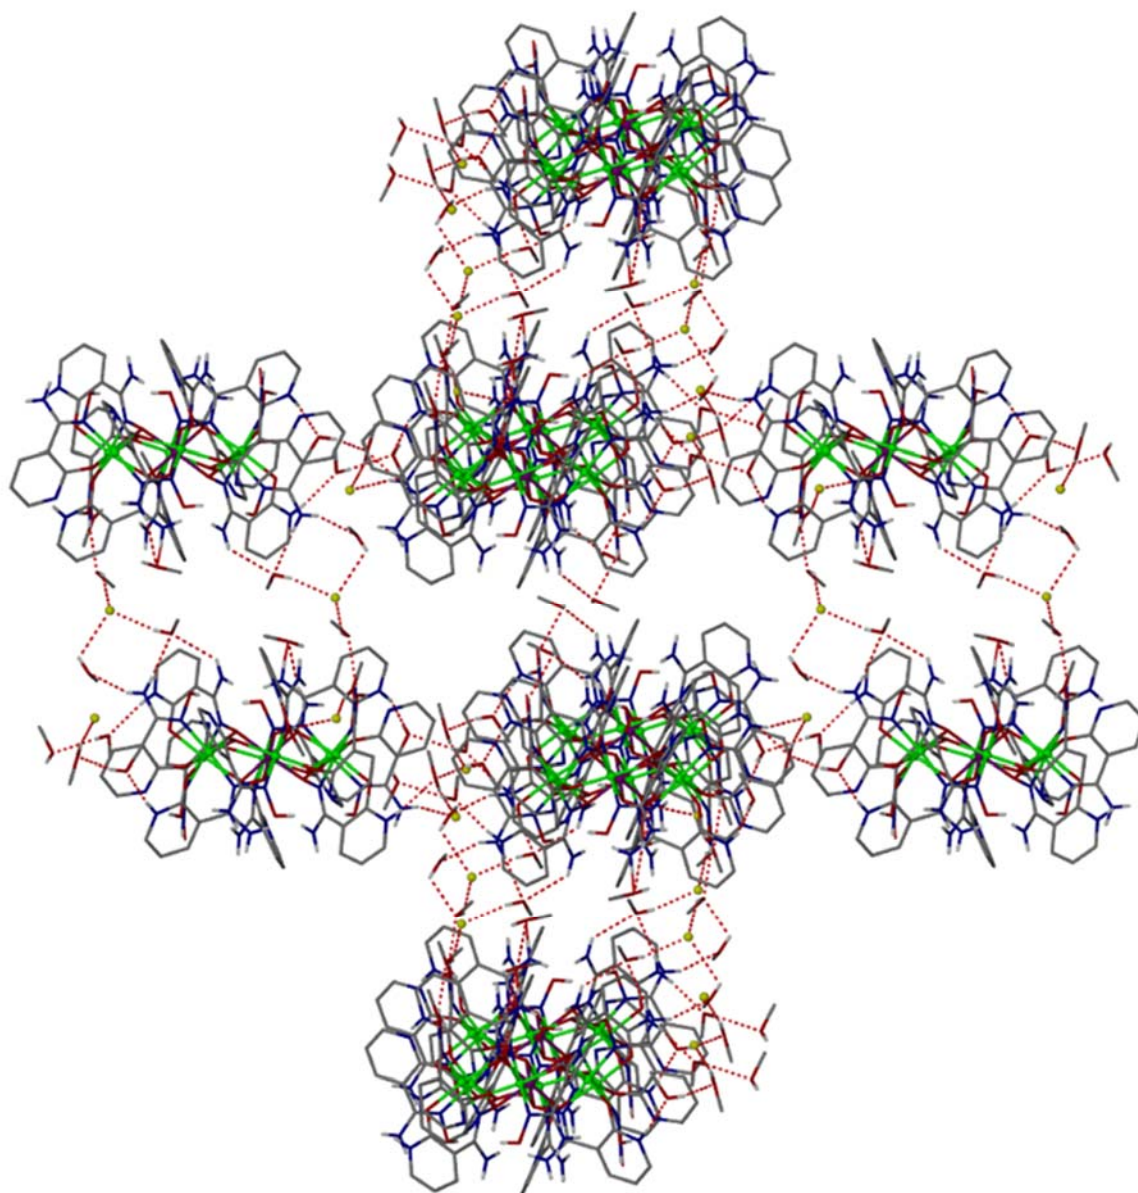

**Figure S2.** The packing of the molecules of **1** down the *a* axis showing the hydrogen-bonding interactions (dashed red lines). Several C and H atoms have been omitted for clarity. Disordered solvates were not considered. Color Code: C gray, N blue, O red, Ni green, Cr brown, H white.
